# Supplementary material for: Deep phylogenomics of a tandem-repeat galectin regulating appendicular skeletal pattern formation
Source: PubMed Central journal article supplement (PMC4989294; doi:10.1186/s12862-016-0729-6), 2016-08-18
Supplement: 12862_2016_729_MOESM2_ESM.pdf [file 12862_2016_729_MOESM2_ESM.pdf]

|                       | <b>Percentage of conserved residues shared with shark</b>            | <b>Percentage of strongly conserved residues shared with shark</b> |              |
|-----------------------|----------------------------------------------------------------------|--------------------------------------------------------------------|--------------|
| Actinopterygian Gal-8 | 90                                                                   | 91                                                                 |              |
| Sarcopterygian Gal-8  | 92                                                                   | 93                                                                 |              |
|                       | <b>Percentage of conserved (strongly) residues shared with shark</b> |                                                                    |              |
|                       | <b>Pre-N-CRD</b>                                                     | <b>N-CRD</b>                                                       | <b>C-CRD</b> |
| Actinopterygian Gal-8 | 60(67)                                                               | 93(95)                                                             | 90(88)       |
| Sarcopterygian Gal-8  | 66(75)                                                               | 97(97)                                                             | 91(92)       |
